Correction

# Correction: Generating a Dynamic Synthetic Population – Using an Age-Structured Two-Sex Model for Household Dynamics

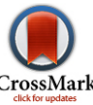

The PLOS ONE Staff

The first author's name is incorrect in the citation. The correct citation is:

Namazi-Rad M, Mokhtarian P, Perez P (2014) Generating a Dynamic Synthetic Population – Using an Age-Structured Two-Sex Model for Household Dynamics. PLoS ONE 9(4): e94761. doi:10.1371/journal.pone.0094761

The first subheading in the Population Synthesis Methods section is incorrect. The correct subheading is:

Synthetic Reconstruction (SR) Approach.

## Reference

1. Namazi-Rad M-R, Mokhtarian P, Perez P (2014) Generating a Dynamic Synthetic Population – Using an Age-Structured Two-Sex Model for Household Dynamics. PLoS ONE 9(4): e94761. doi:10.1371/journal.pone.0094761

**Citation:** The PLOS ONE Staff (2014) Correction: Generating a Dynamic Synthetic Population – Using an Age-Structured Two-Sex Model for Household Dynamics. PLoS ONE 9(7): e104138. doi:10.1371/journal.pone.0104138

**Published:** July 25, 2014

**Copyright:** © 2014 The PLOS ONE Staff. This is an open-access article distributed under the terms of the Creative Commons Attribution License, which permits unrestricted use, distribution, and reproduction in any medium, provided the original author and source are credited.
